# Supplementary material for: Anion-induced N-doping of naphthalenediimide polymer semiconductor in organic thin-film transistors
Source: Springer Nature journal article supplement (doi:10.1038/s41528-018-0024-2), 2018-03-13
Supplement: MOESM1 [file 41528_2018_24_MOESM1_ESM.docx]

**Anion-Induced N-doping of Naphthalenediimide Polymer Semiconductor in Organic Thin Film Transistors**

Yang Han,1,2 Zhuping Fei,1 Yen-Hung Lin,2 Jaime Martin Perez,3 Floriana Tuna,4 Thomas D. Anthopoulos,2,5 and Martin Heeney*,1

1 Dept. Chemistry and Centre for Plastic Electronics, Imperial College London, Exhibition Rd, London, SW7 2AZ, UK.

2 Dept. Physics and Centre for Plastic Electronics, Imperial College London, Exhibition Rd, London, SW7 2AZ, UK.

3 Dept. of Materials, Imperial College London, Exhibition Rd, London, SW7 2AZ, UK.

4 School of Chemistry and Photon Science Institute, University of Manchester, Oxford Rd, Manchester, M13 9PL, U.K.

5 Division of Physical Sciences and Engineering, King Abdullah University of Science and Technology, Thuwal 23955-6900, Saudi Arabia.

Figure S1. Microwave power saturation plots of films doped with 0.25 eq. (black) and 1 eq. (red) TBAF.

Figure S2. Plots of signal intensity for films doped with (a) 0.025 eq. (b) 0.25 eq. and (c) 1 eq. TBAF measured under identical conditions (microwave power: 1.262 mW; modulation amplitude: 1 G; number of scans: 3; microwave frequency: 9.85 GHz; room temperature)

Figure S3. Representative plots of the transfer (a) and output (b) characteristics of transistors based on un-doped and doped P(NDI2OD-T2) with different equivalents of TBAF.

Figure S4. Transfer (a) and (d), and output (b) and (e) characteristics of BC/TG configuration OTFT device based on un-doped (a-c) and doped P(NDI2OD-T2) with 0.025 eq. of TBAF (d-f). (c) and (f) show mobility calculation based on first derivative of the linear regime transfer curve and first derivative of the square root of the saturation regime transfer curve.

Table S1. Summary of un-doped and TBAF doped P(NDI2OD-T2) transistor device performance parameters extracted from transfer and output characteristics.

Figure S5. Contact resistance of OTFT devices based on un-doped and doped P(NDI2OD-T2) with representative equivalents of TBAF determined from the interception of linear fits at L= 0 μm at each gate bias.

Figure S6. Representative plots of the transfer characteristics of transistors based on un-doped P(NDI2OD-T2) polymer and the same polymer with 0.025 eq. tributylamine (TBA) or tetrabutylammonium fluoride (TBAF), tetrabutylammonium chloride (TBACl), tetrabutylammonium bromide (TBABr) and tetrabutylammonium iodide (TBAI) added.

Table S2. Summary of transistor device performance parameters based on un-doped and doped P(NDI2OD-T2) with 0.025 eq. of each dopant.

Figure S7. X-ray diffraction patterns of drop-cast un-doped (507_0), doped with 0.025 eq. TBAF (597_0.025) and 0.25 eq. TBAF (597_0.25) P(NDI2OD-T2) films on silicon substrates.
